# Supplementary material
Source: PubMed Central journal article supplement (PMC7202204)

Figure 1A

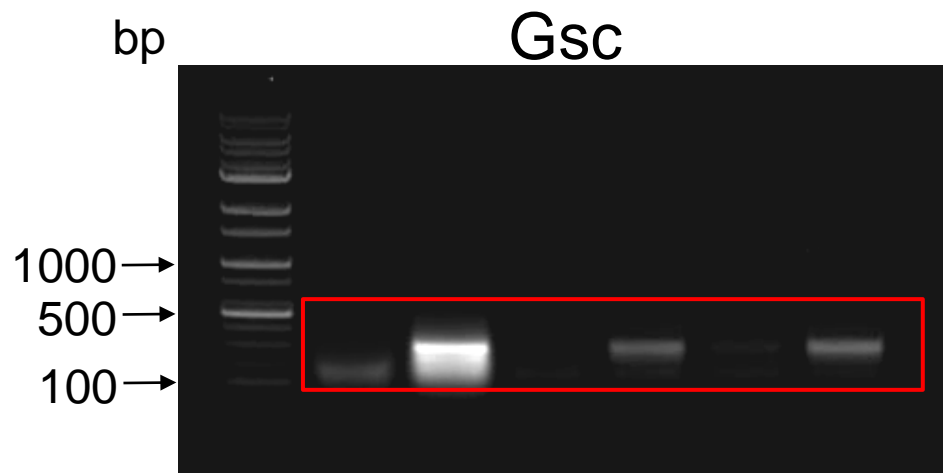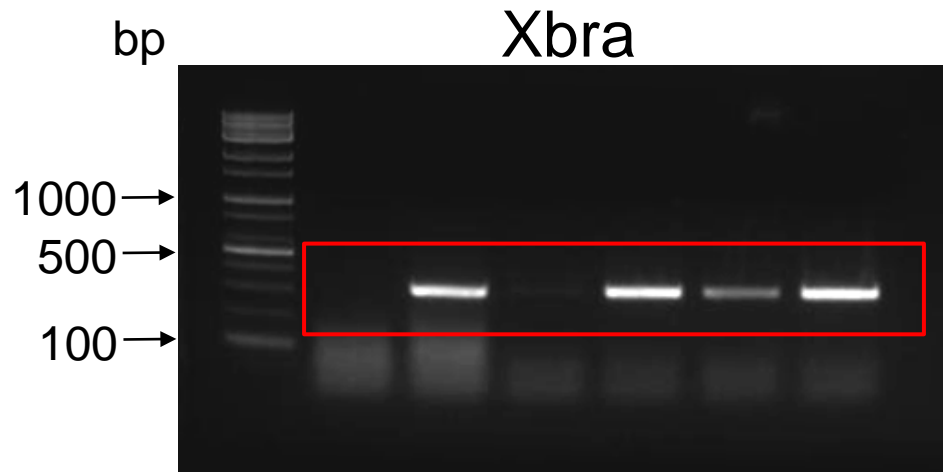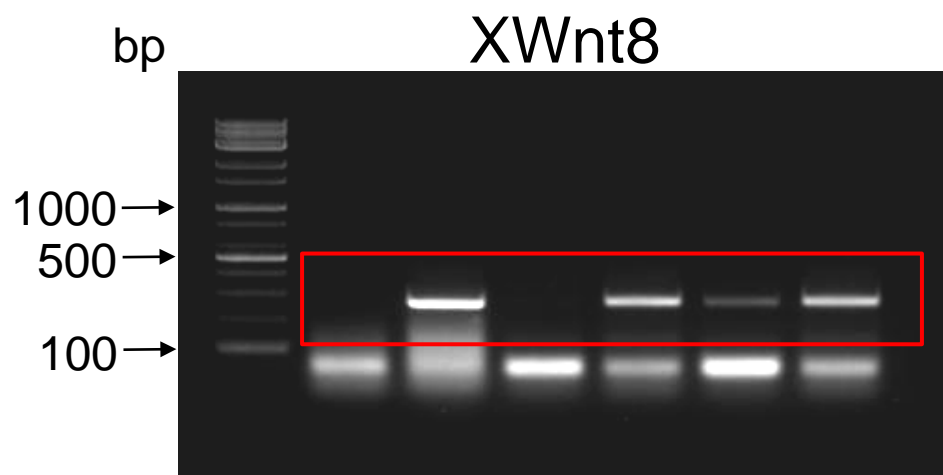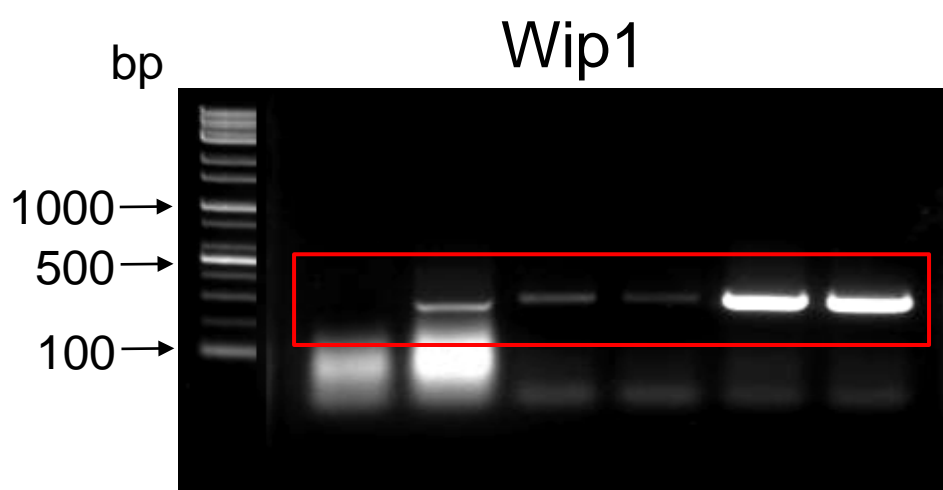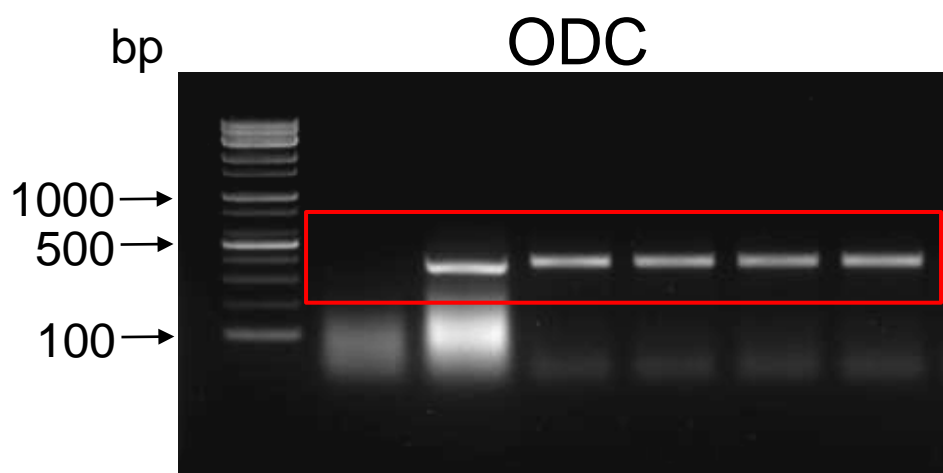

Figure 1B

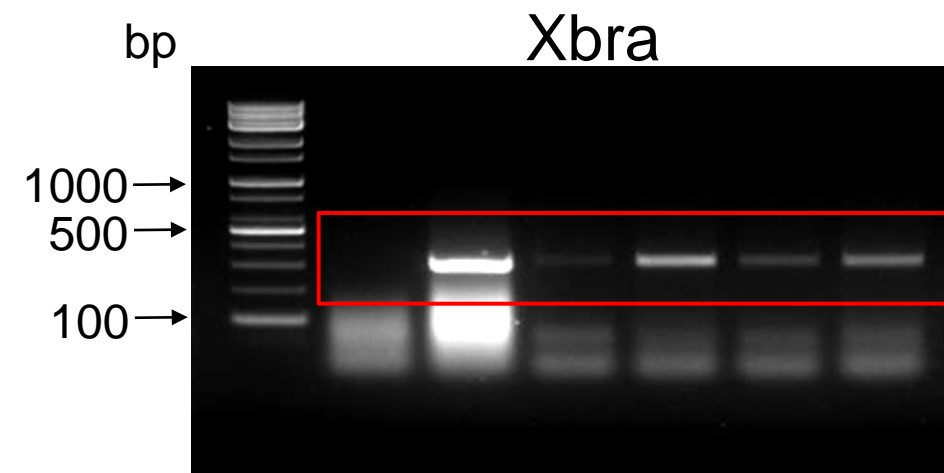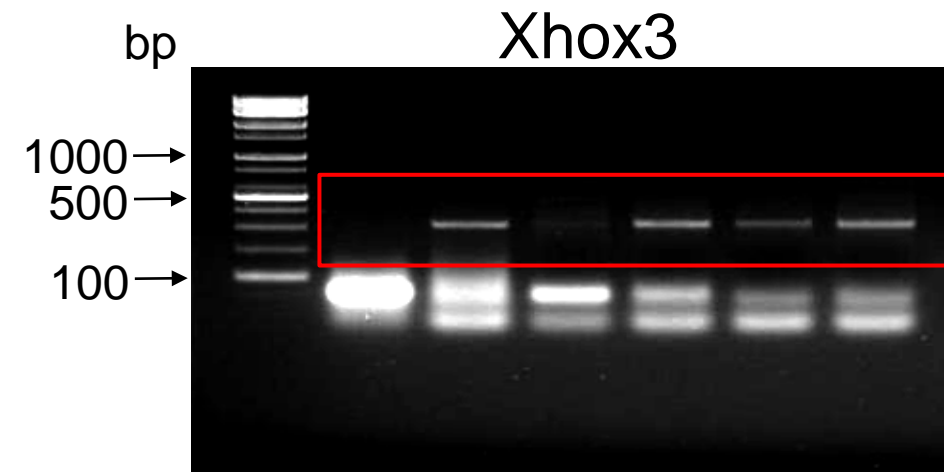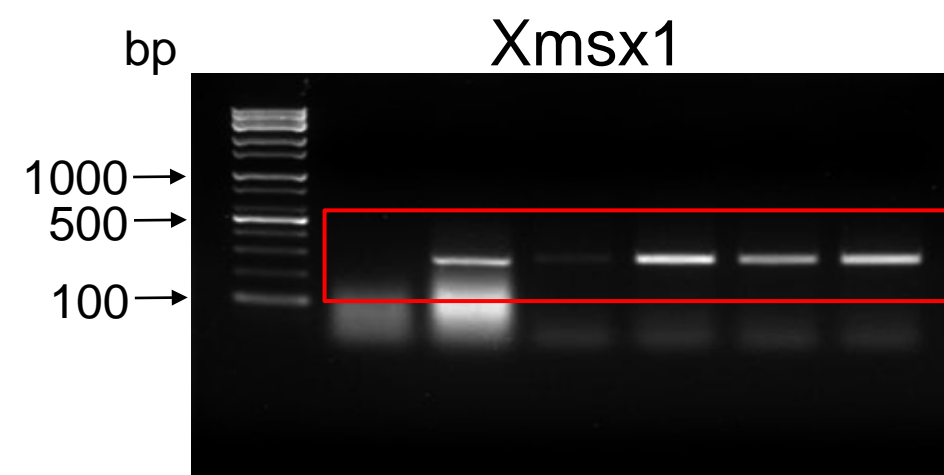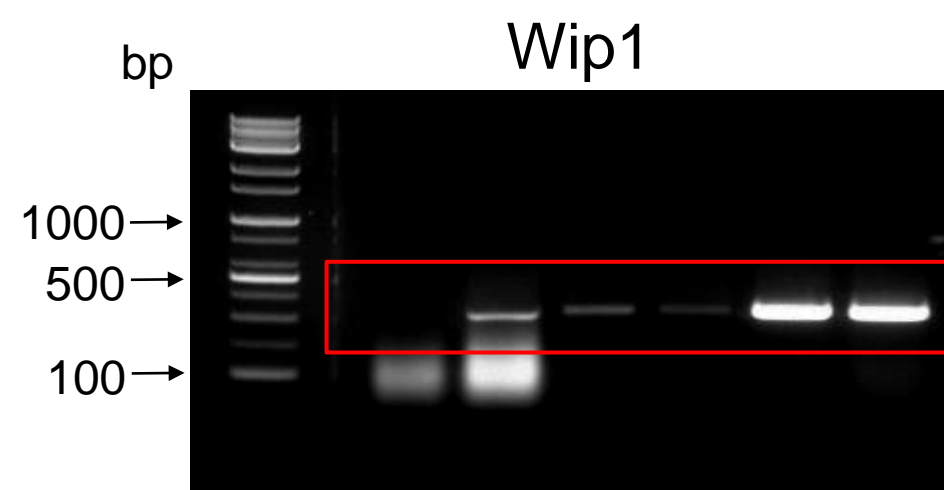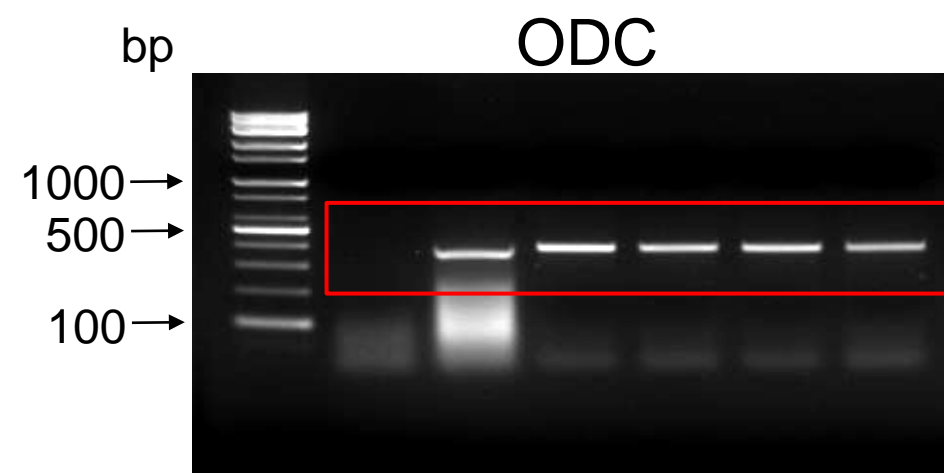

Figure 1C

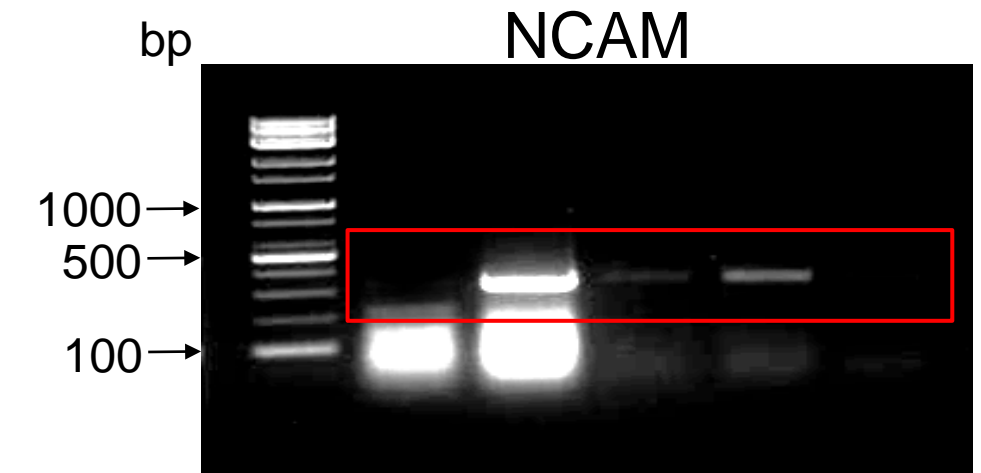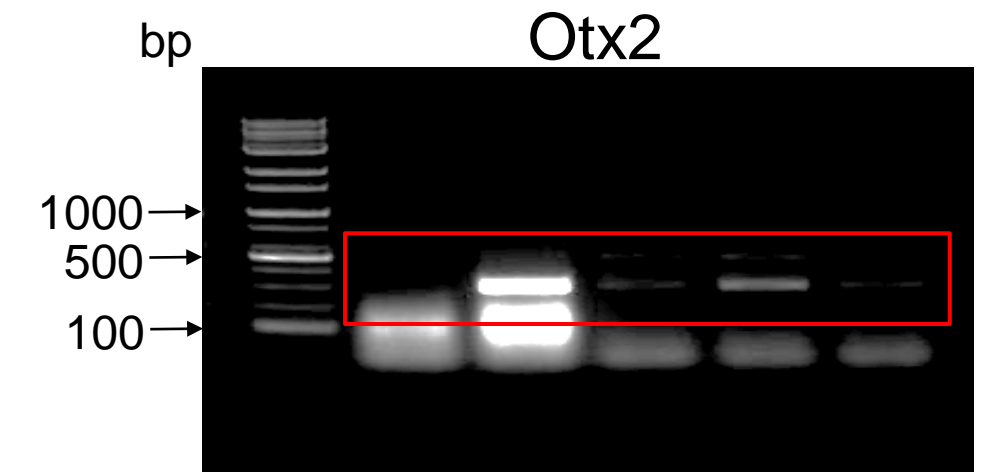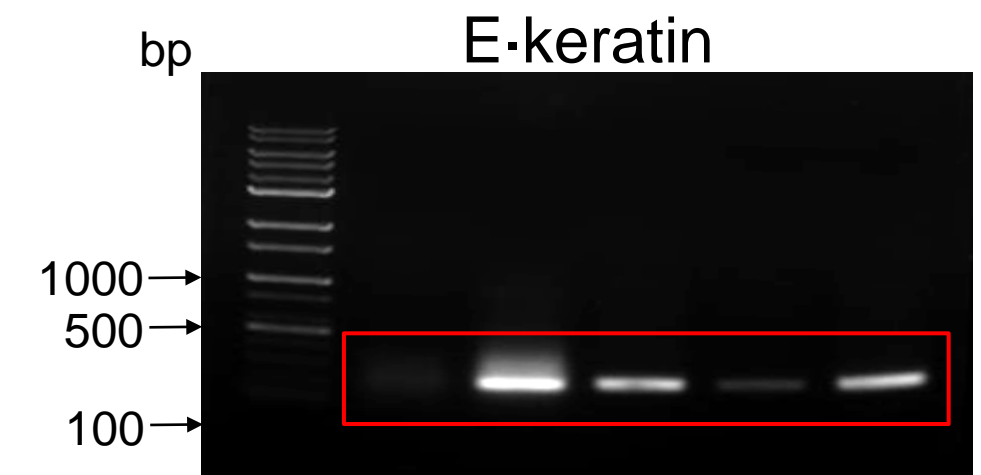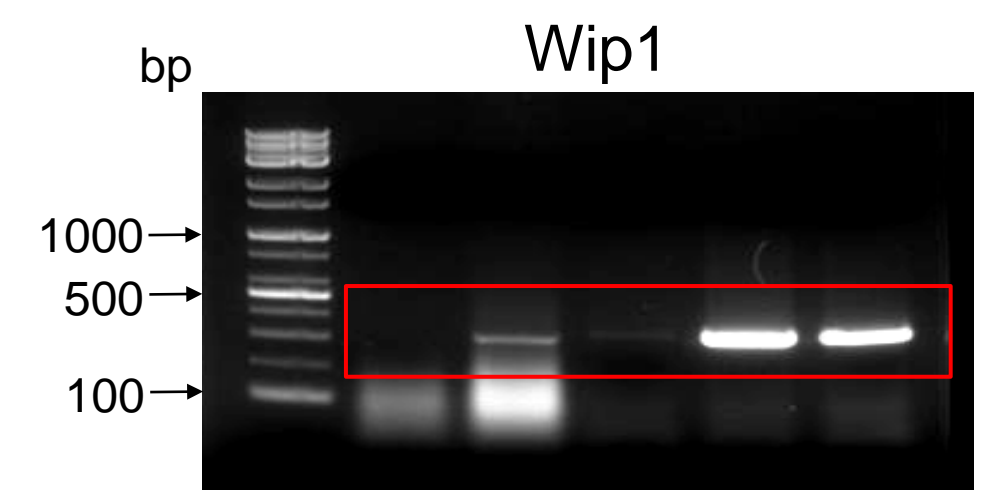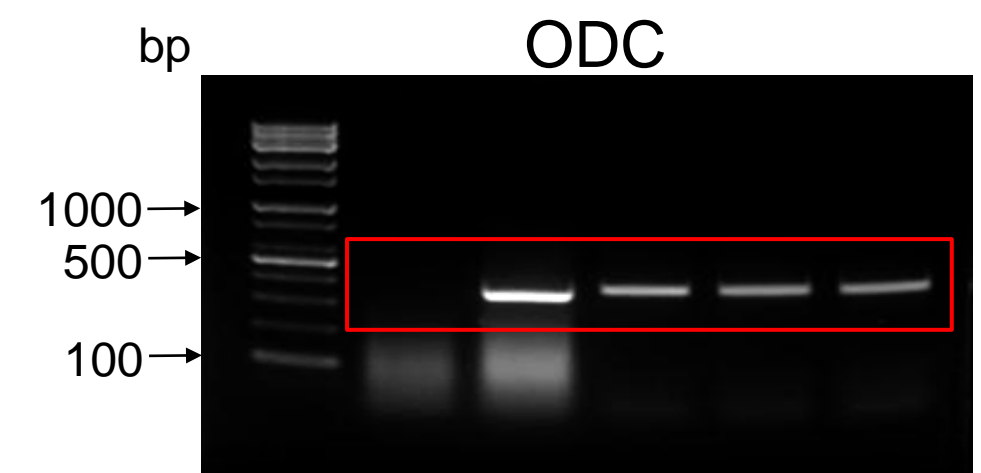

Supplement: EMBR-21-e48693-s003.pdf [file EMBR-21-e48693-s003.pdf]

Figure 6A

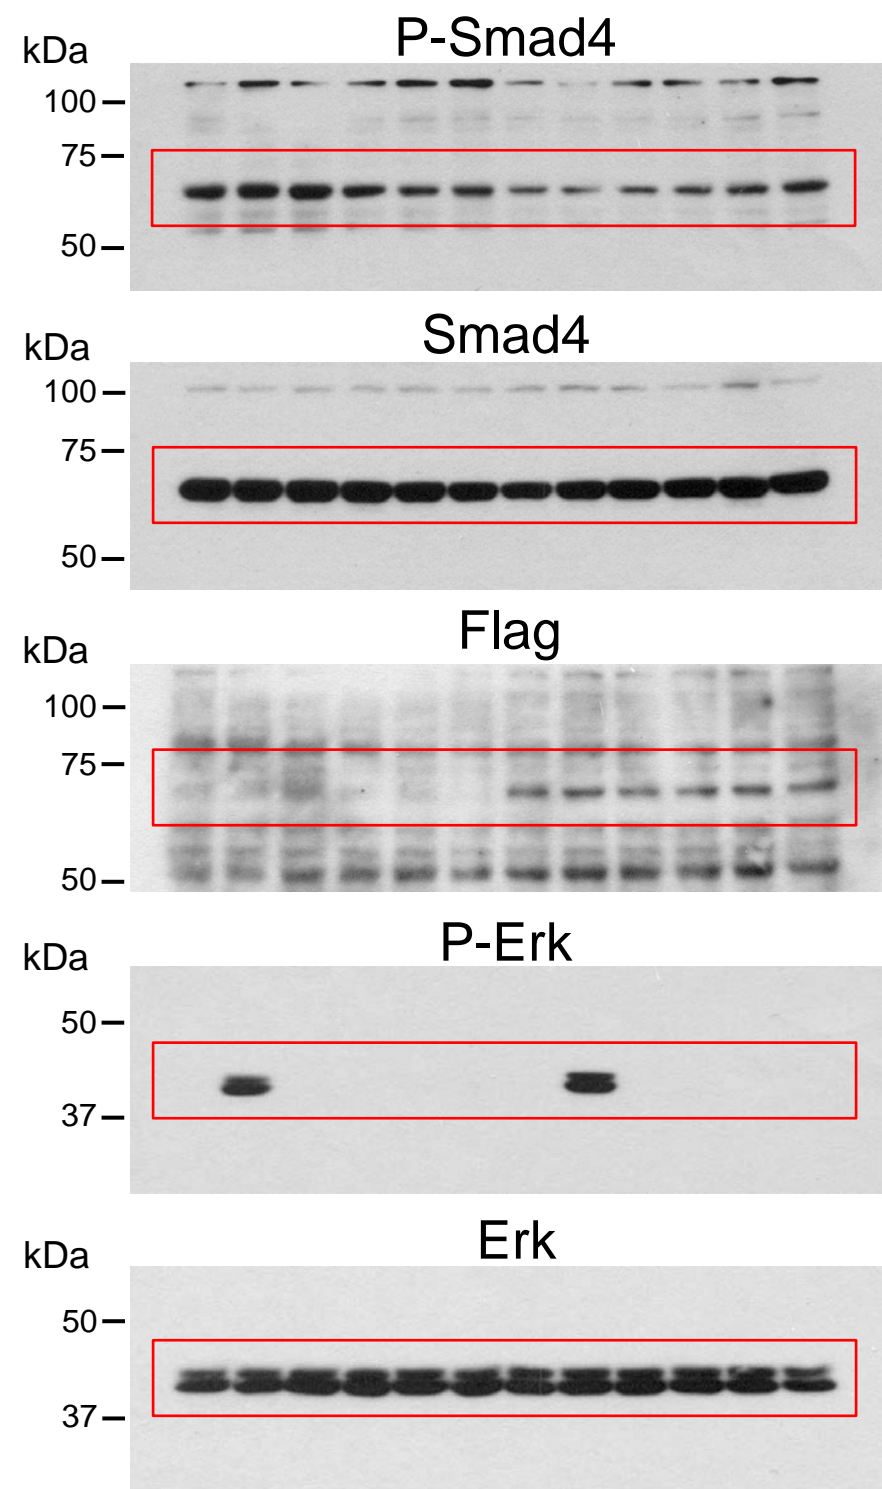

Figure 6B

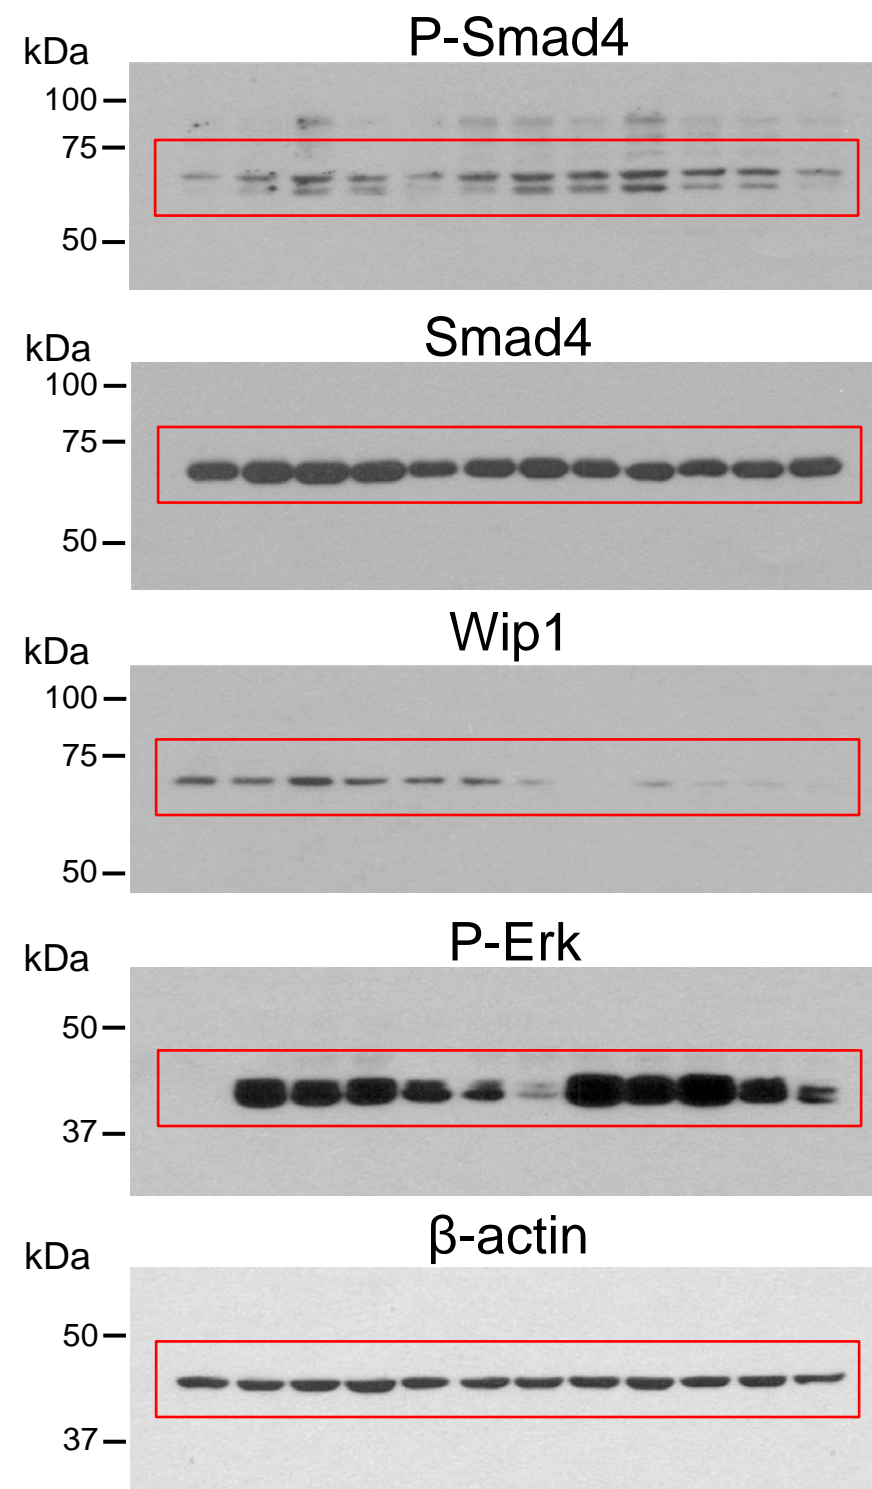

Figure 6D

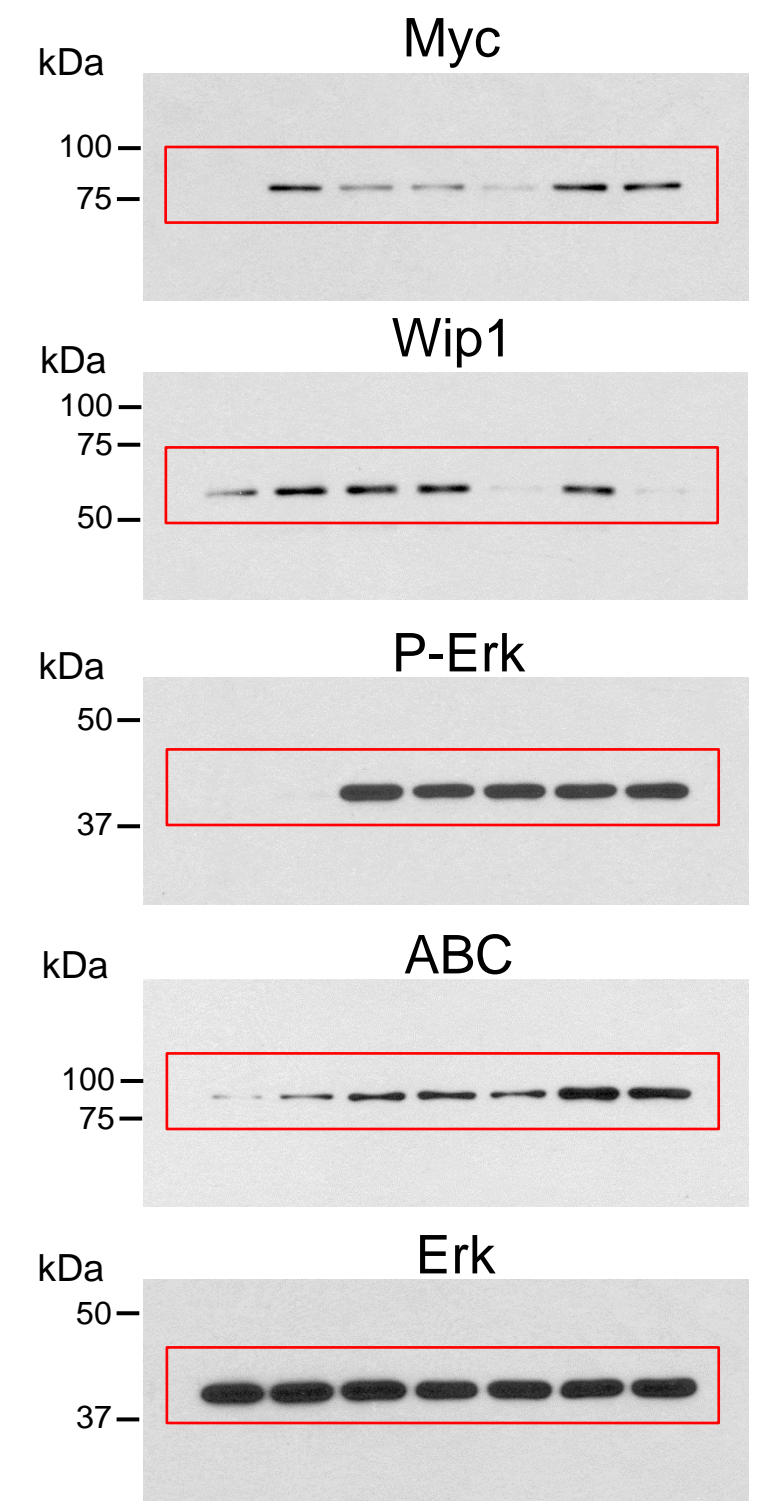

Figure 6C

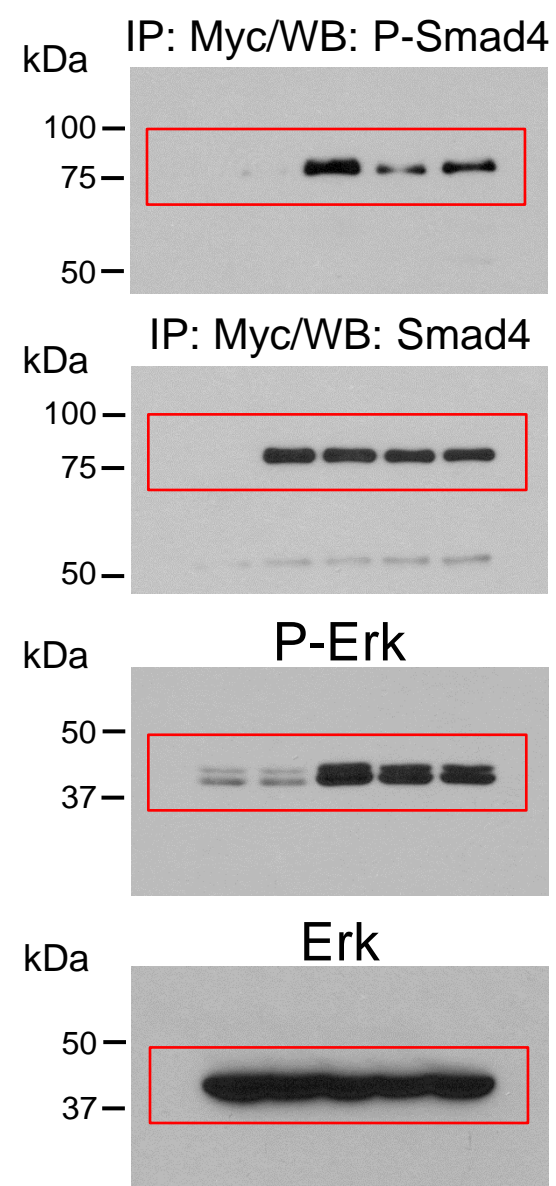

Figure 6E

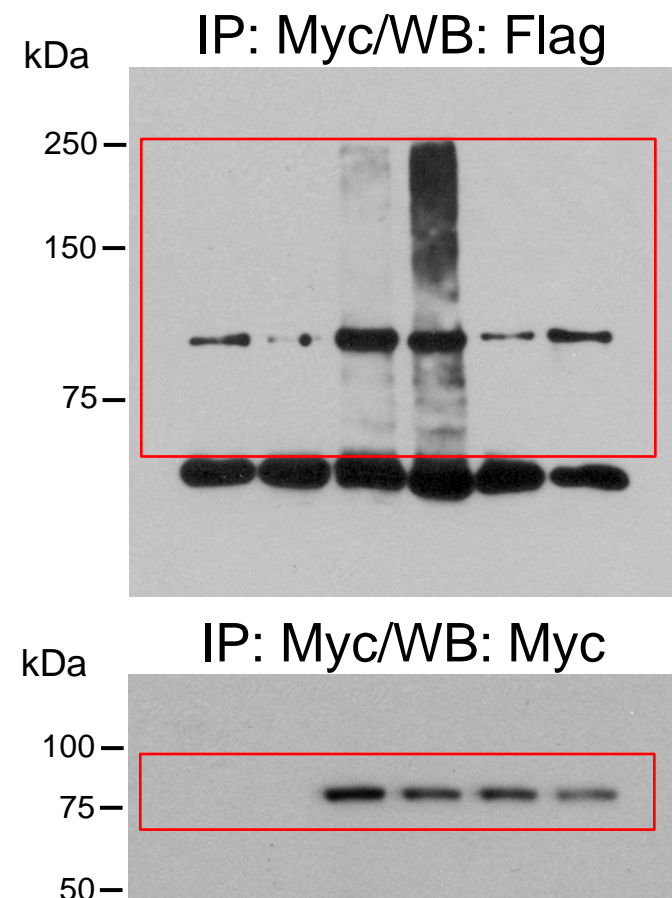

Figure 6E

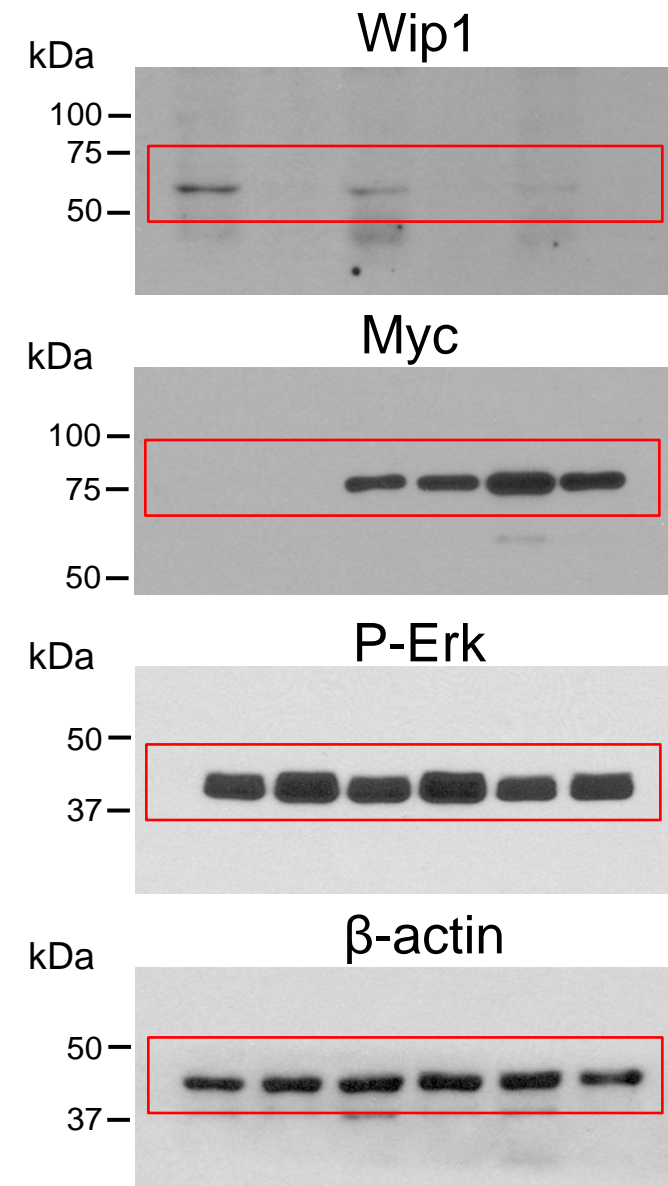

Figure 6F

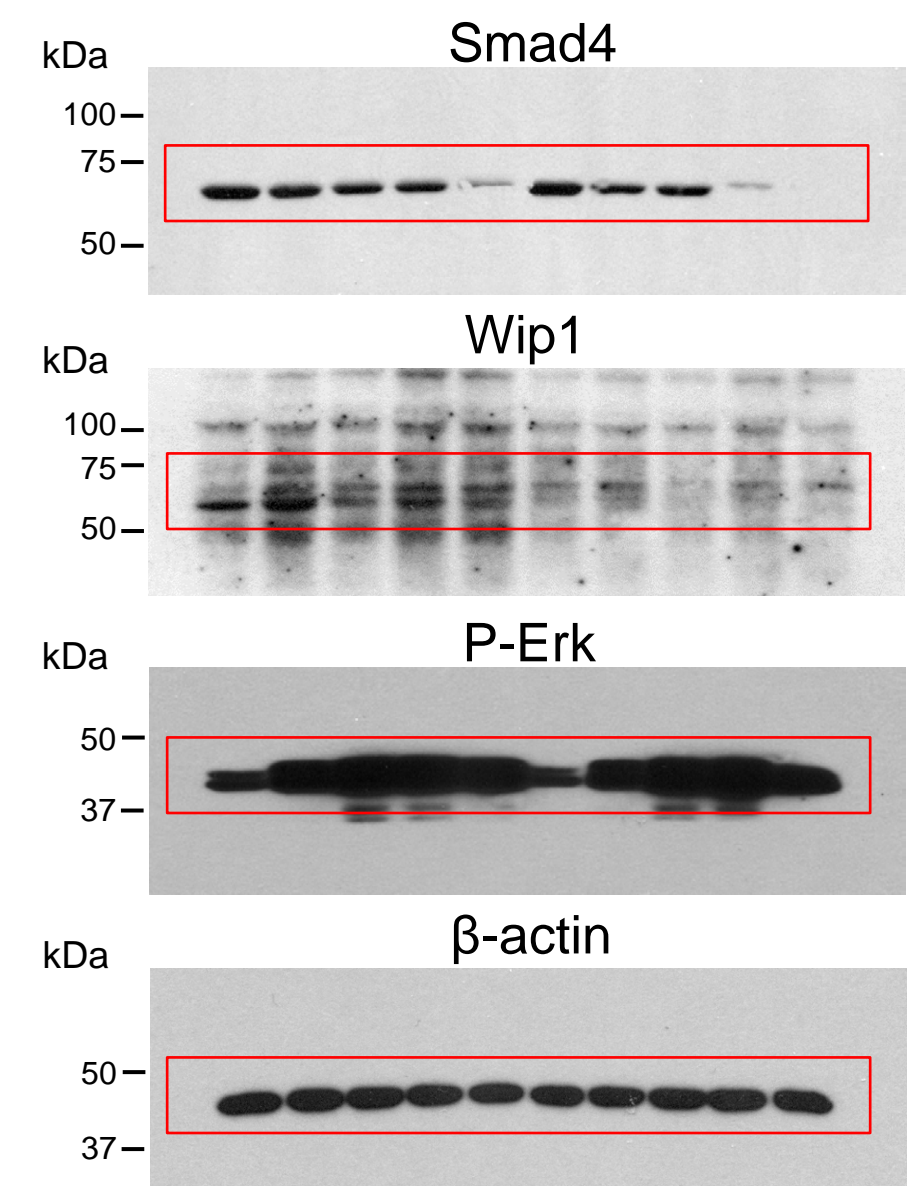

Supplement: EMBR-21-e48693-s006.pdf [file EMBR-21-e48693-s006.pdf]

Figure 7L

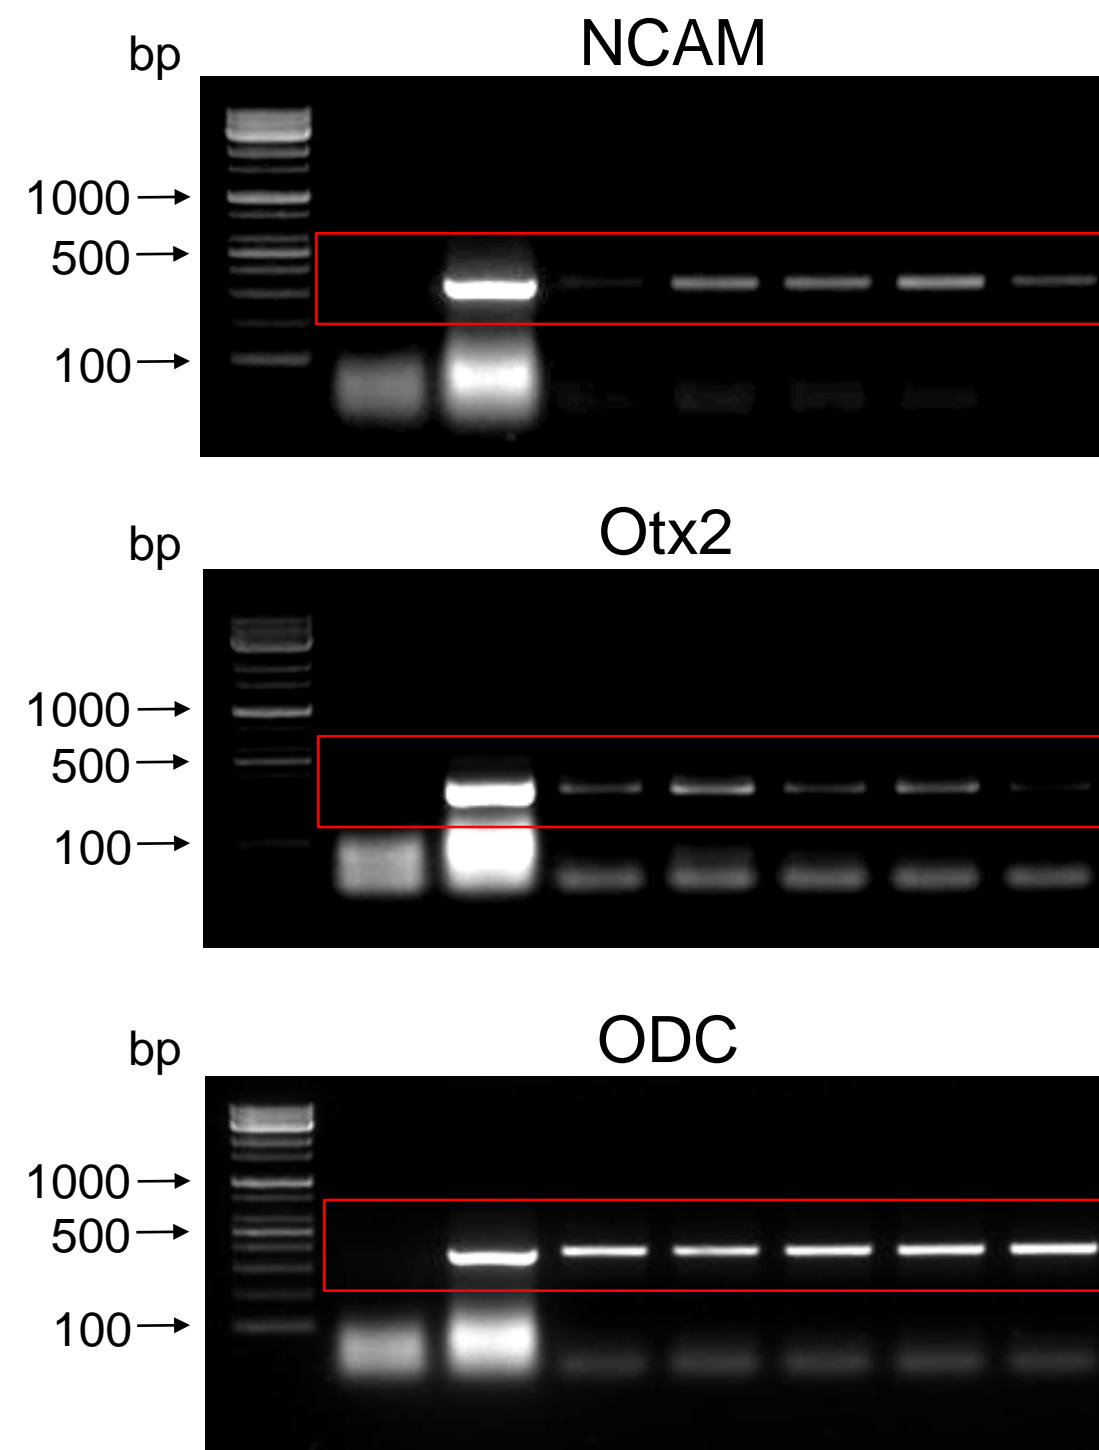

Supplement: EMBR-21-e48693-s007.pdf [file EMBR-21-e48693-s007.pdf]
